# Supplementary material
Source: Royal Society of Chemistry journal article supplement (doi:10.1039/d6ob00777e)
Supplement: d6ob00777e1.pdf [file d6ob00777e1.pdf]

## *Supporting Information*

### **Single-Step Synthesis of 3,5-diazido 1,2,4-triazole: Environmentally Benign High-Performance Primary Explosives**

Sagar Nehe <sup>a</sup> and Srinivas Dharavath <sup>a\*</sup>

<sup>a</sup>Energetic Materials Laboratory, Department of Chemistry, Indian Institute of Technology Kanpur, Kanpur-208016, Uttar Pradesh, India. E-mail: [srinivasd@iitk.ac.in](mailto:srinivasd@iitk.ac.in)

#### **Table of Contents**

|                                                                                                              |        |
|--------------------------------------------------------------------------------------------------------------|--------|
| Reaction mechanism                                                                                           | S1-S2  |
| Crystal Structure analysis for <b>DATr</b>                                                                   | S2-S3  |
| Copies of <sup>1</sup> H and <sup>13</sup> C{ <sup>1</sup> H}, IR, HRMS Spectra and DSC plot for <b>DATr</b> | S4-S10 |

#### **Plausible reaction mechanism for the synthesis of 3,5-Diazido-1,2,4-triazole from 3,5-Diamino-1,2,4-triazole:**

**Step 1: Generation of Nitrosyl Cation:** Sodium nitrite reacts with sulfuric acid to generate nitrous acid, which is protonated to form the electrophile nitrosonium ion (NO)<sup>+</sup>.

**Step 2: Nitrosation of the Amino Groups:** The amino groups at the 3- and 5-positions of 3,5-diamino-1,2,4-triazole attack the nitrosonium ion.

**Step 3: Formation of Diazonium Intermediates:** Under strongly acidic conditions, the nitrosamine tautomerizes to the diazohydroxide form. Protonation of the hydroxyl group converts it into a good leaving group followed by loss of water gives the diazonium ion (R-N<sub>2</sub><sup>+</sup>). Because there are two amino groups, a bis-diazonium triazole salt forms.

**Step 4: Nucleophilic Substitution by Azide:** Azide ion attacks the diazonium carbon and displaces nitrogen functionality. This substitution occurs at both diazonium centres to form DATr as the final product.

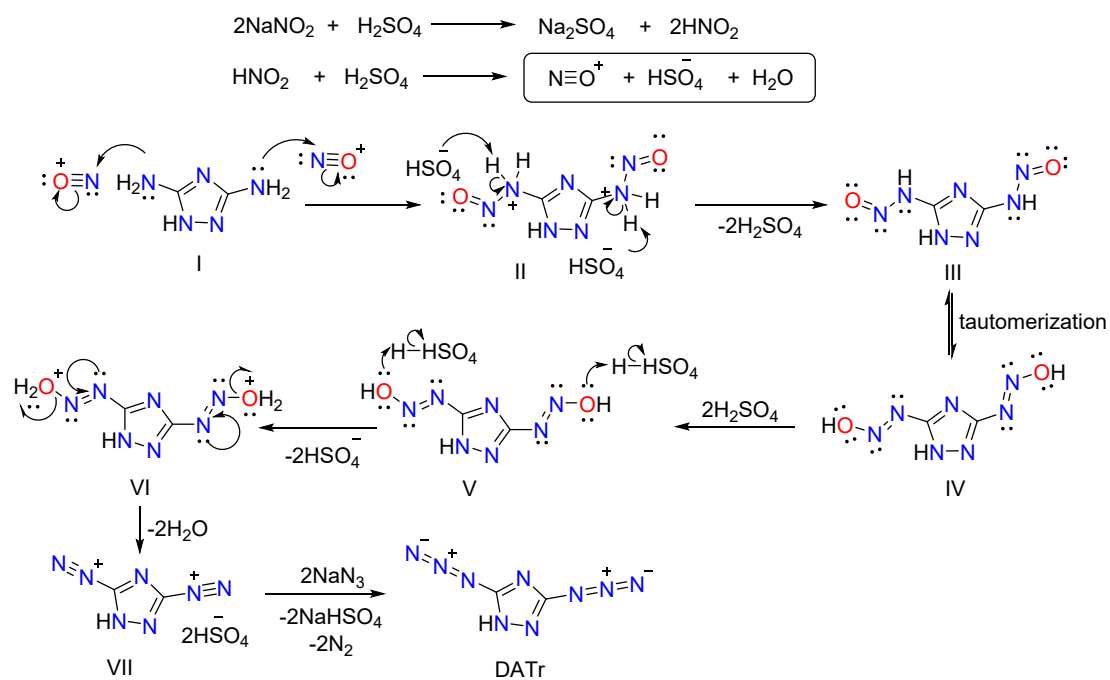

**Scheme S1.** Plausible reaction mechanism for the synthesis of 3,5-Diazido-1,2,4-triazole from 3,5-Diamino-1,2,4-triazole

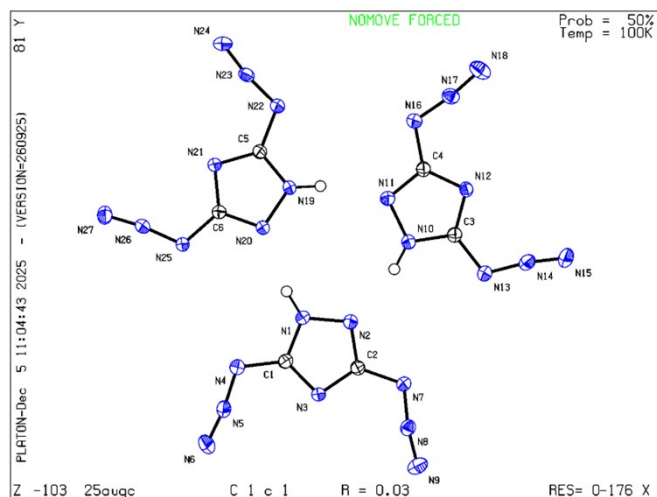

**Figure S1:** Molecular Structure of DATr.

**Table S1: Crystal data and structure refinement for DATr.**

|                   |                                |
|-------------------|--------------------------------|
| CCDC No.          | 2513812                        |
| Empirical formula | C <sub>2</sub> HN <sub>9</sub> |
| Formula weight    | 151.12                         |
| Temperature/K     | 100.0                          |
| Crystal system    | monoclinic                     |
| Space group       | Cc                             |

|                                             |                                          |
|---------------------------------------------|------------------------------------------|
| a/Å                                         | 12.0395(10)                              |
| b/Å                                         | 23.364(2)                                |
| c/Å                                         | 8.0029(6)                                |
| $\alpha$ /°                                 | 90                                       |
| $\beta$ /°                                  | 125.292(2)                               |
| $\gamma$ /°                                 | 90                                       |
| Volume/Å <sup>3</sup>                       | 1837.5(3)                                |
| Z                                           | 12                                       |
| $\rho$ calc/cm <sup>3</sup>                 | 1.639                                    |
| $\mu$ /mm <sup>-1</sup>                     | 0.131                                    |
| F(000)                                      | 912.0                                    |
| Crystal size/mm <sup>3</sup>                | 0.17 × 0.15 × 0.1                        |
| Radiation                                   | MoK $\alpha$ ( $\lambda$ = 0.71073)      |
| 2 $\Theta$ range for data collection/°      | 4.496 to 56.928                          |
| Index ranges                                | -16 ≤ h ≤ 16, -31 ≤ k ≤ 31, -10 ≤ l ≤ 10 |
| Reflections collected                       | 14578                                    |
| Independent reflections                     | 4580 [Rint = 0.0266, Rsigma = 0.0269]    |
| Data/restraints/parameters                  | 4580/2/299                               |
| Goodness-of-fit on F <sup>2</sup>           | 1.058                                    |
| Final R indexes [I ≥ 2 $\sigma$ (I)]        | R1 = 0.0257, wR2 = 0.0672                |
| Final R indexes [all data]                  | R1 = 0.0266, wR2 = 0.0684                |
| Largest diff. peak/hole / e Å <sup>-3</sup> | 0.21/-0.26                               |

## NMR, IR Spectra, HRMS & TG-DSC plots:

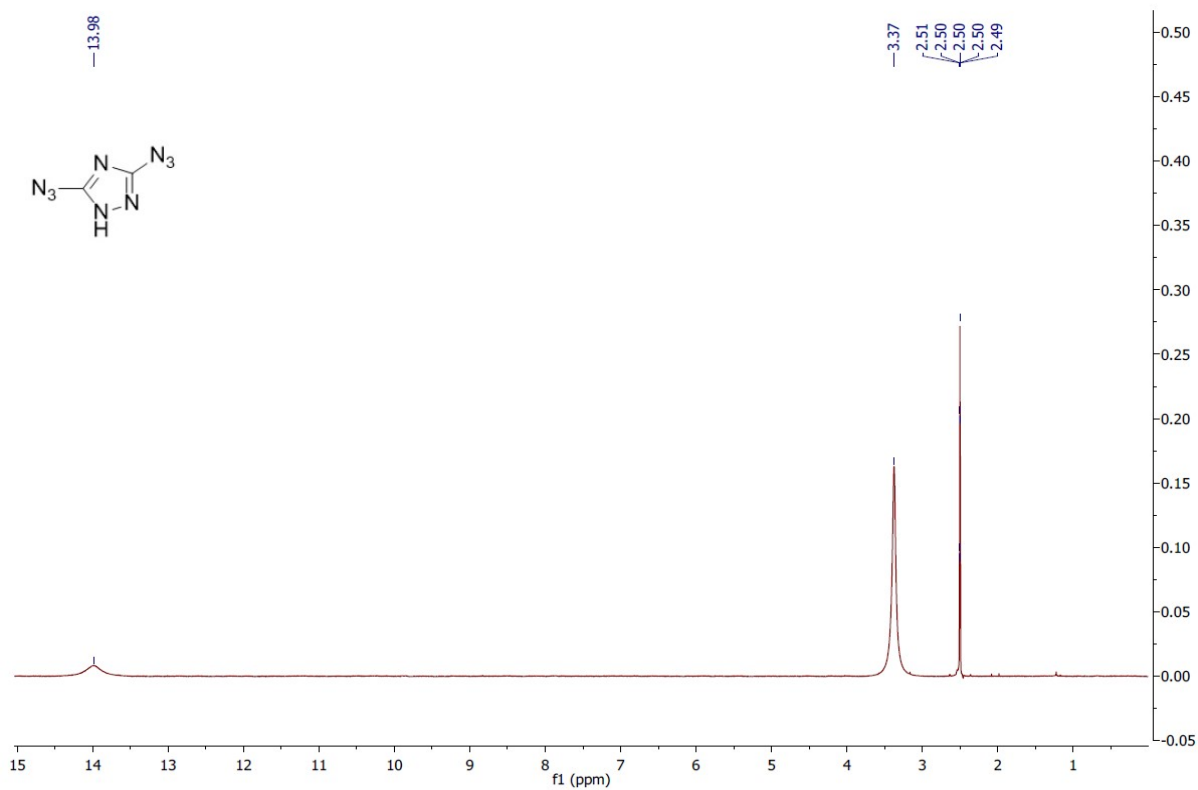

**Figure S2:** <sup>1</sup>H NMR spectrum of DATr (Fresh) in DMSO-*d*<sub>6</sub> in 500 MHz.

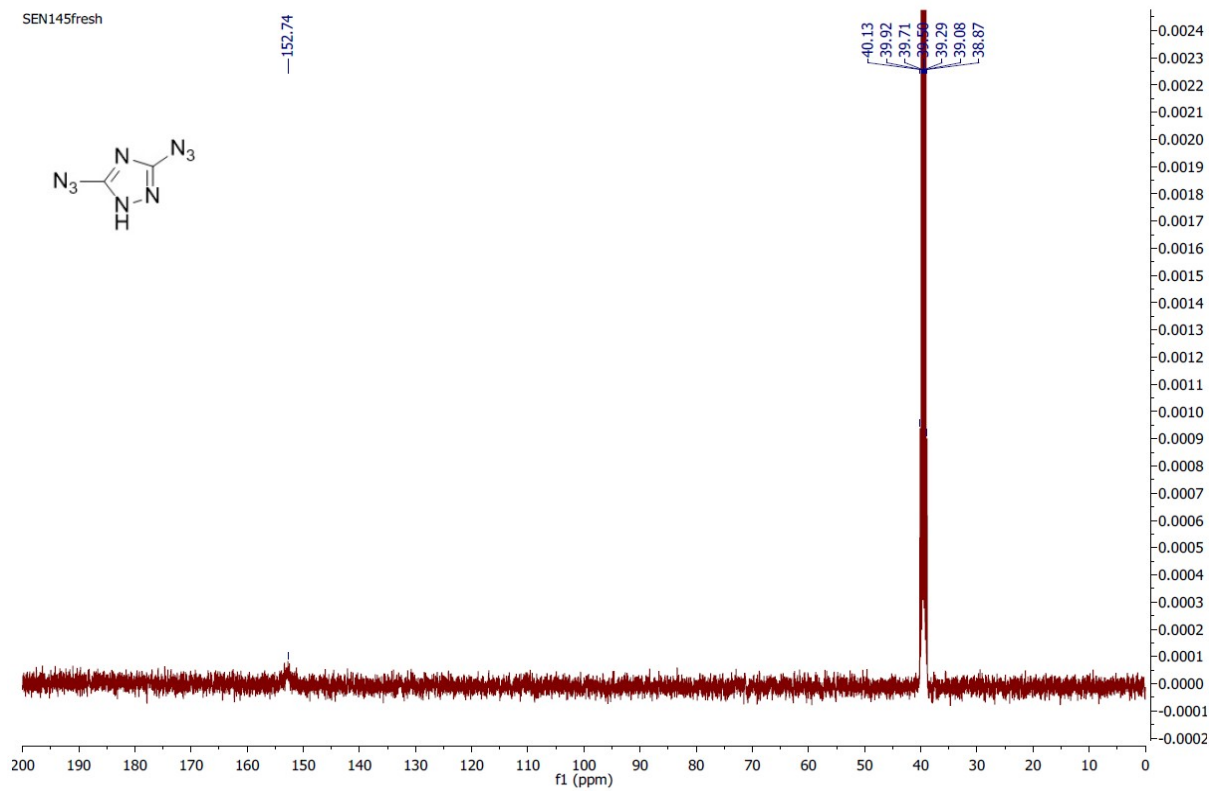

Figure S3:  $^{13}\text{C}$  NMR spectrum of DATr (Fresh) in  $\text{DMSO-}d_6$  in 126 MHz.

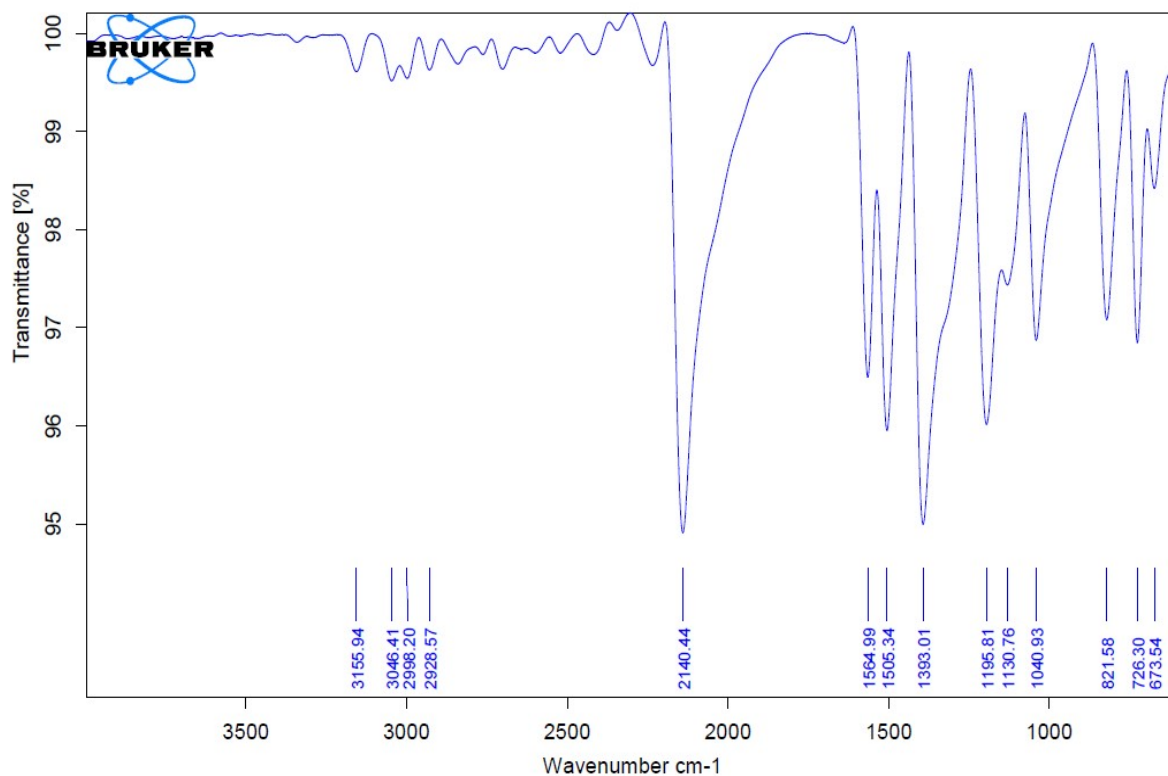

Figure S4: IR spectrum of DATr (Fresh).

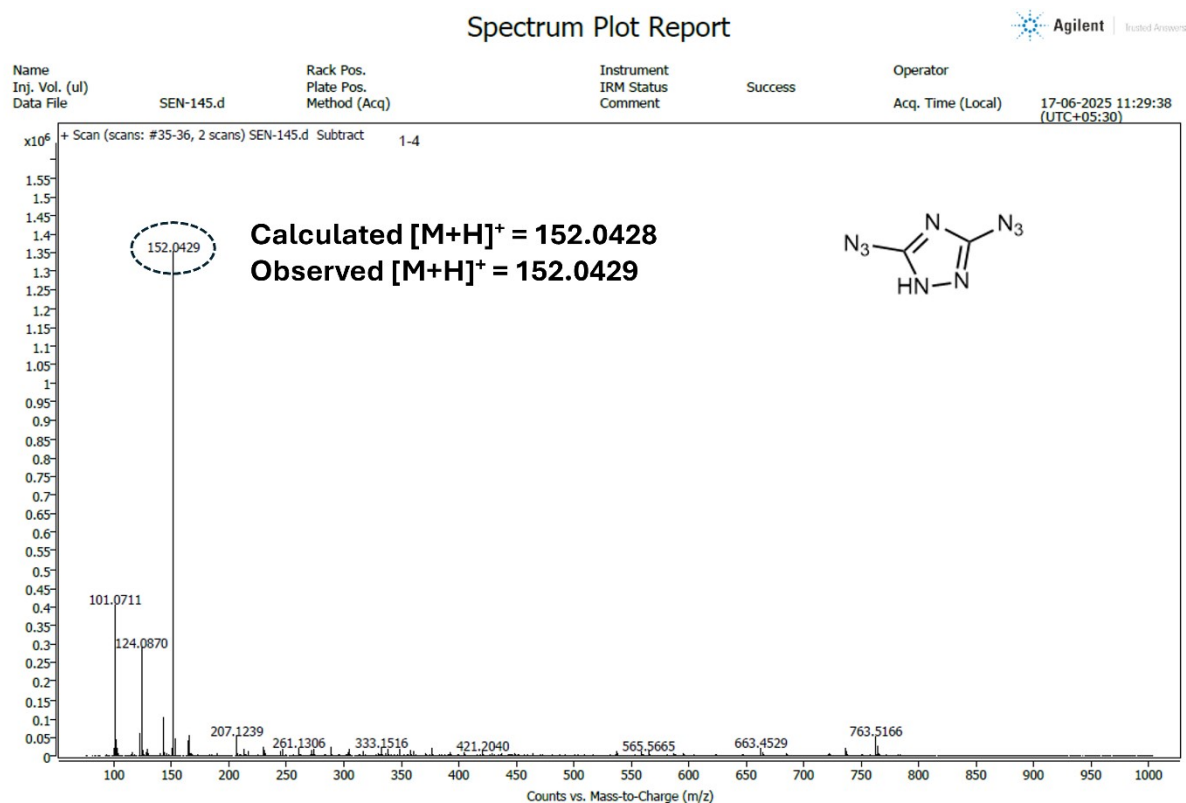

Figure S5: Mass spectrum of DATr (Fresh).

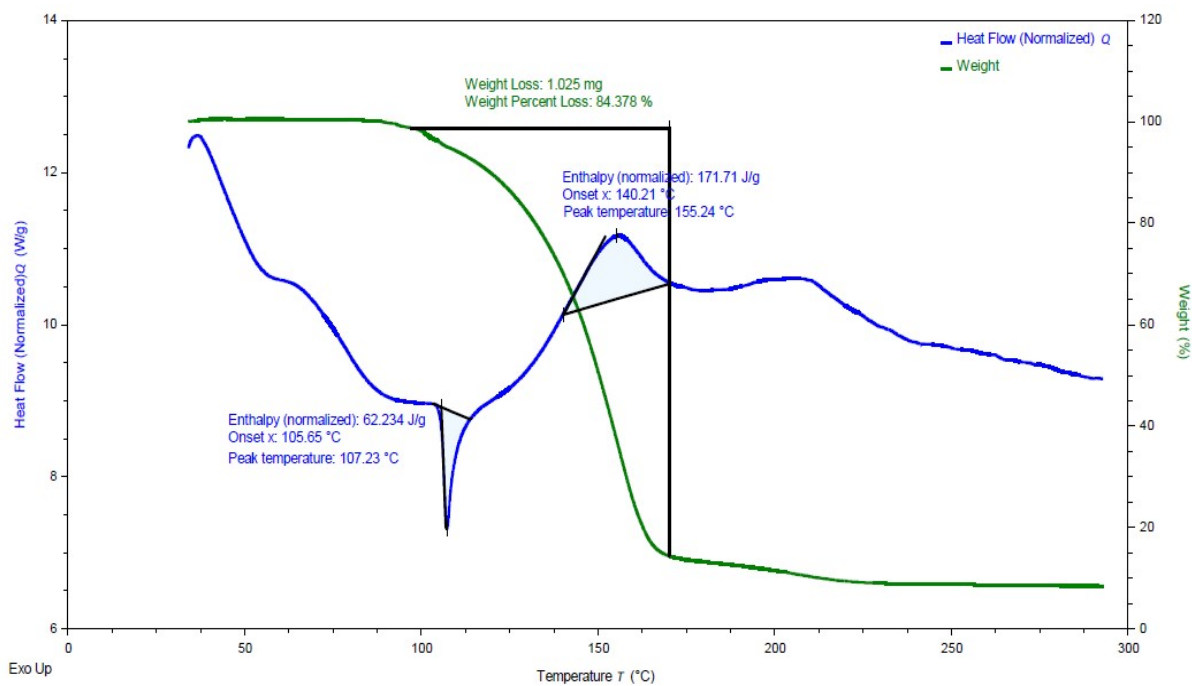

**Figure S6:** DSC spectra of DATr (Fresh) at a heating rate of 5 °C min<sup>-1</sup>.

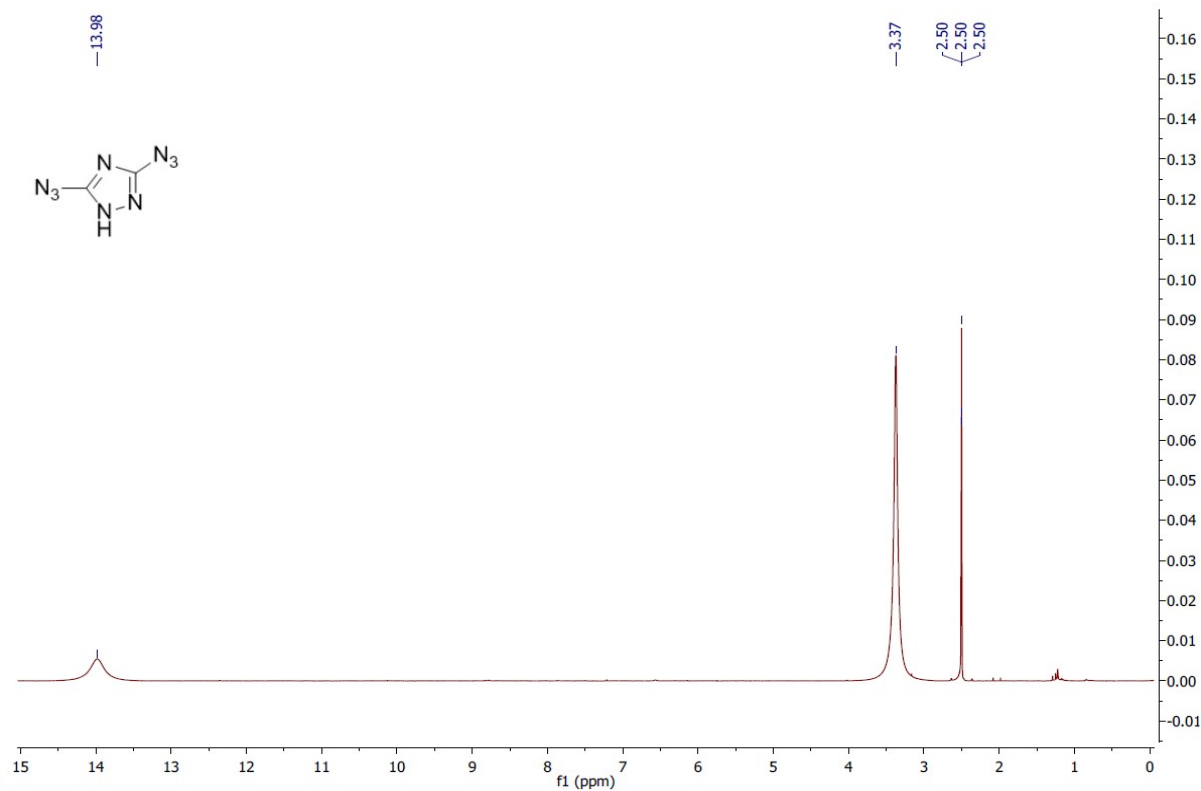

**Figure S7:** <sup>1</sup>H NMR spectrum of DATr (2 months in sunlight) in DMSO-*d*<sub>6</sub> in 500 MHz.

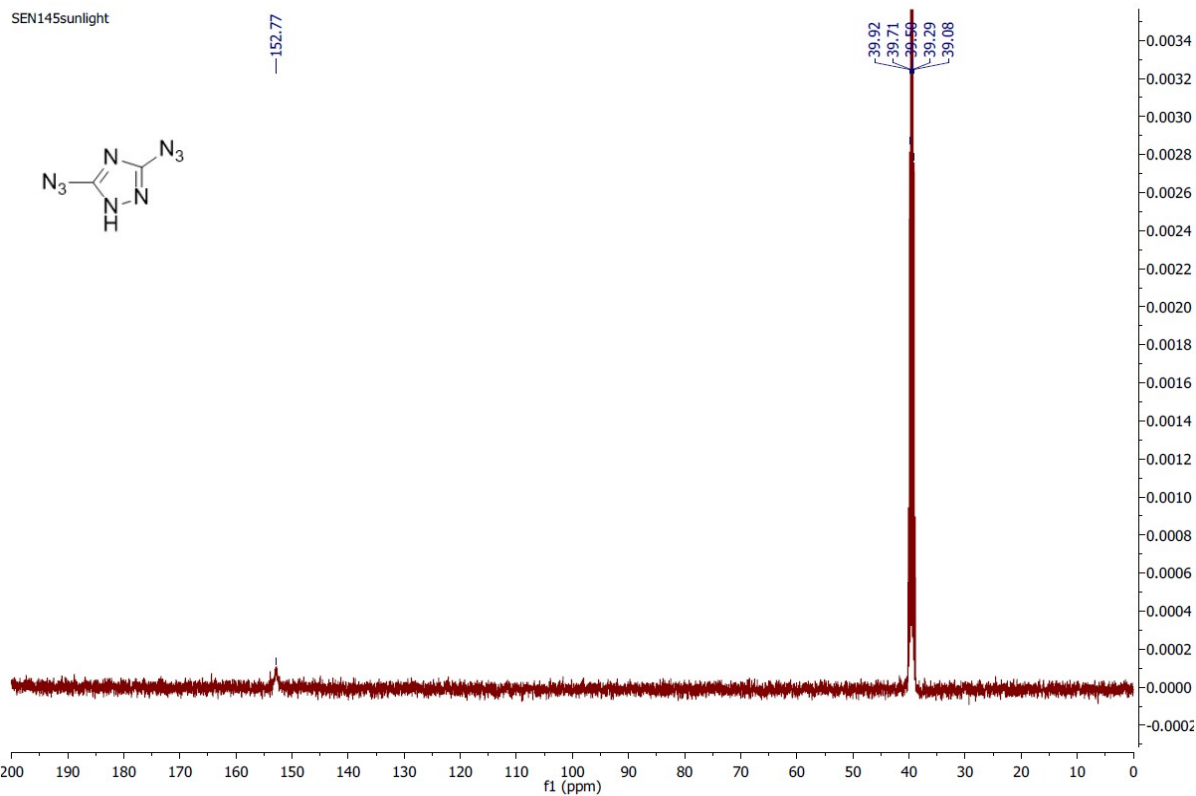

**Figure S8:**  $^{13}\text{C}$  NMR spectrum of **DATr** (2 months in sunlight) in  $\text{DMSO-}d_6$  in 126 MHz.

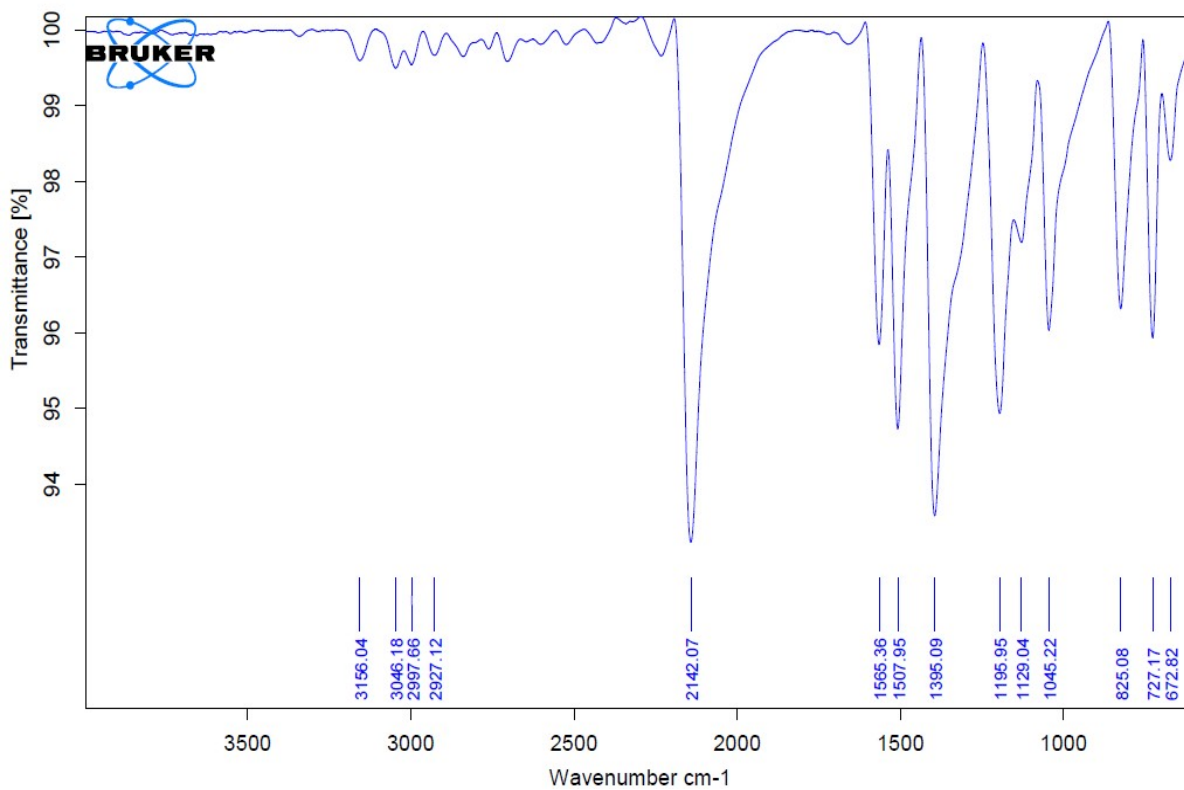

**Figure S9:** IR spectrum of **DATr** (2 months in sunlight).

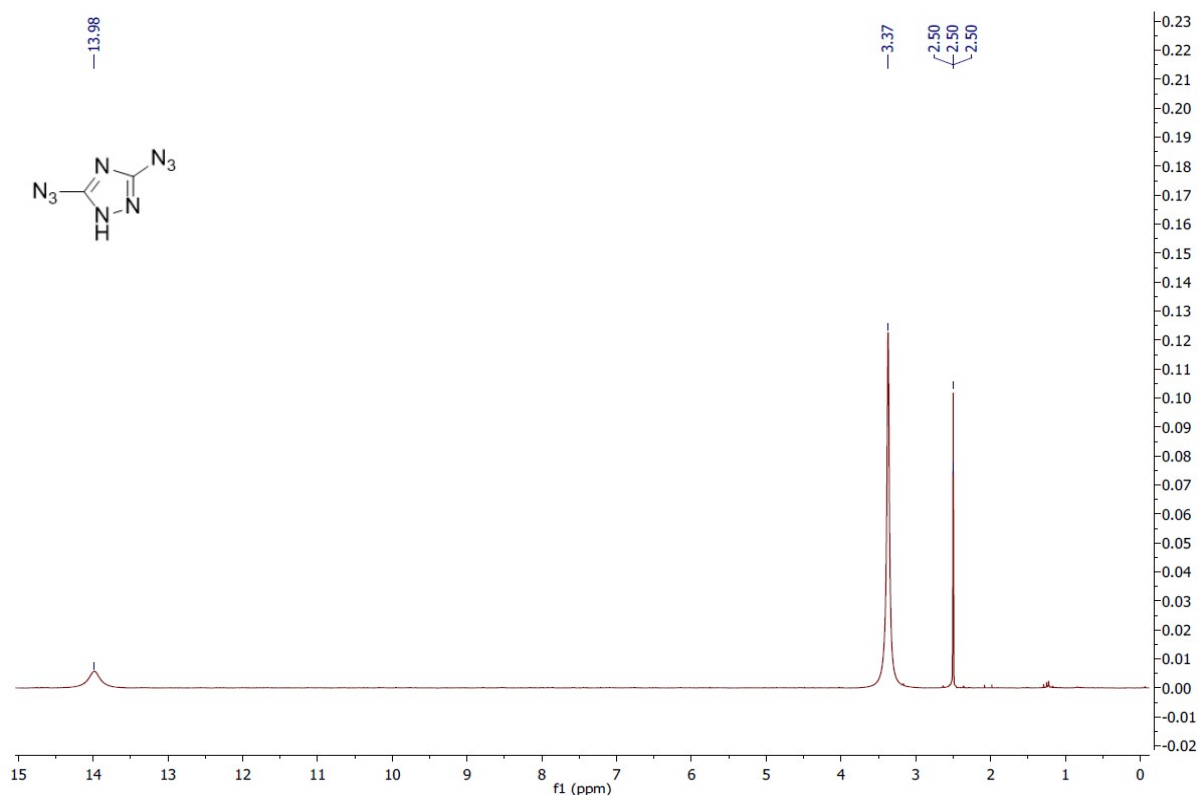

**Figure S10:**  $^1\text{H}$  NMR spectrum of **DATr** (48 h at 70 °C) in **DMSO- $d_6$**  in 500 MHz.

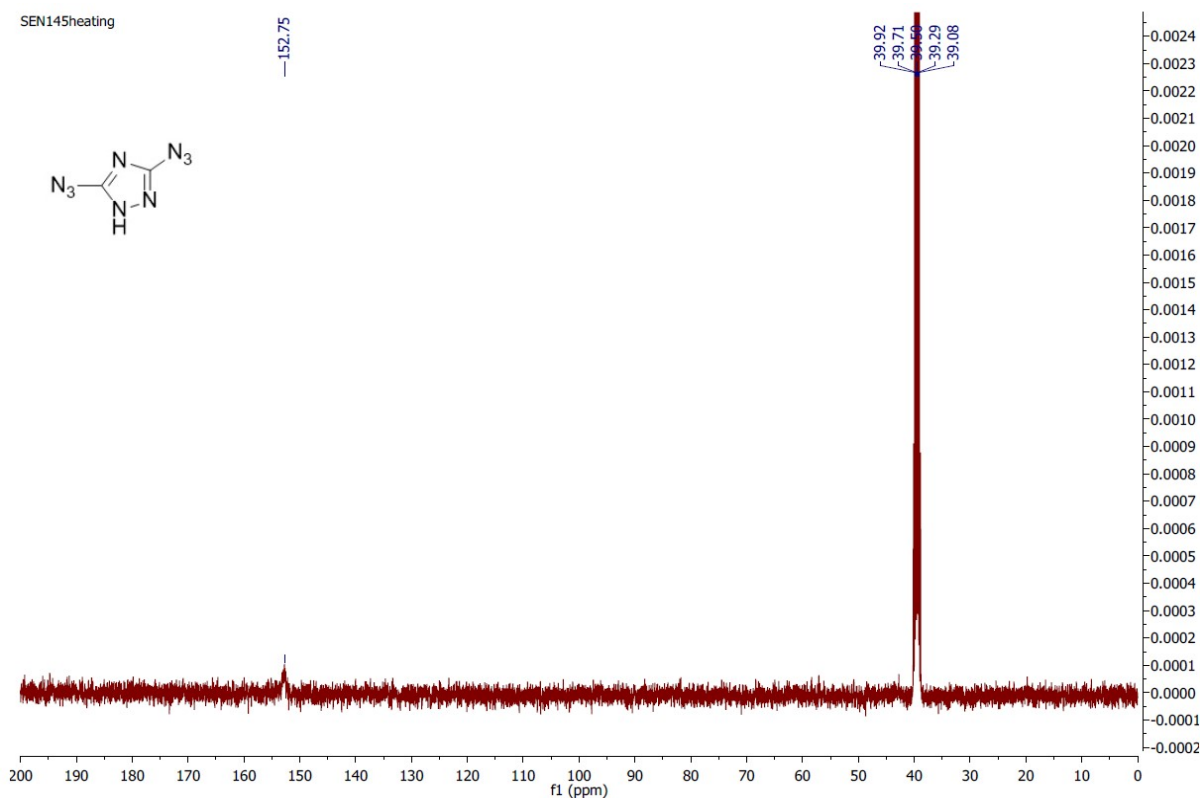

**Figure S11:**  $^{13}\text{C}$  NMR spectrum of **DATr** (48 h at 70 °C) in **DMSO- $d_6$**  in 126 MHz.

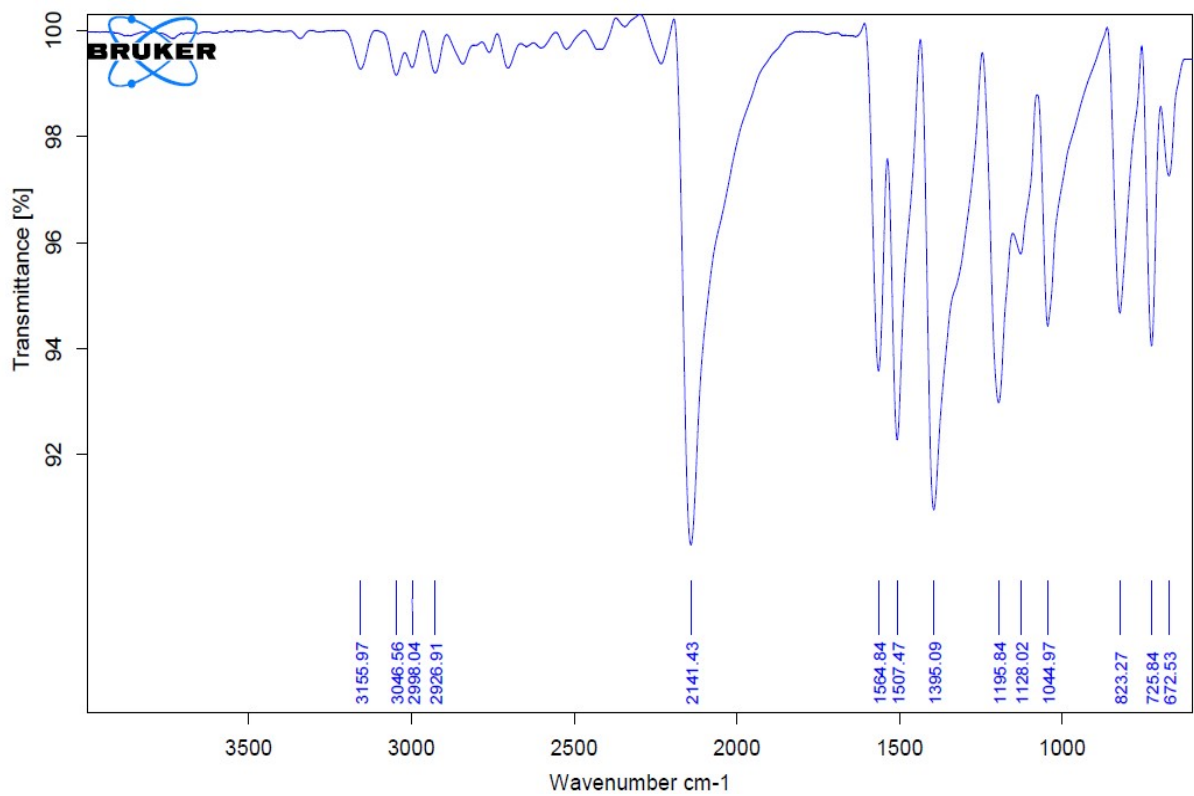

**Figure S12:** IR spectrum of **DATr** (48 h at 70 °C).

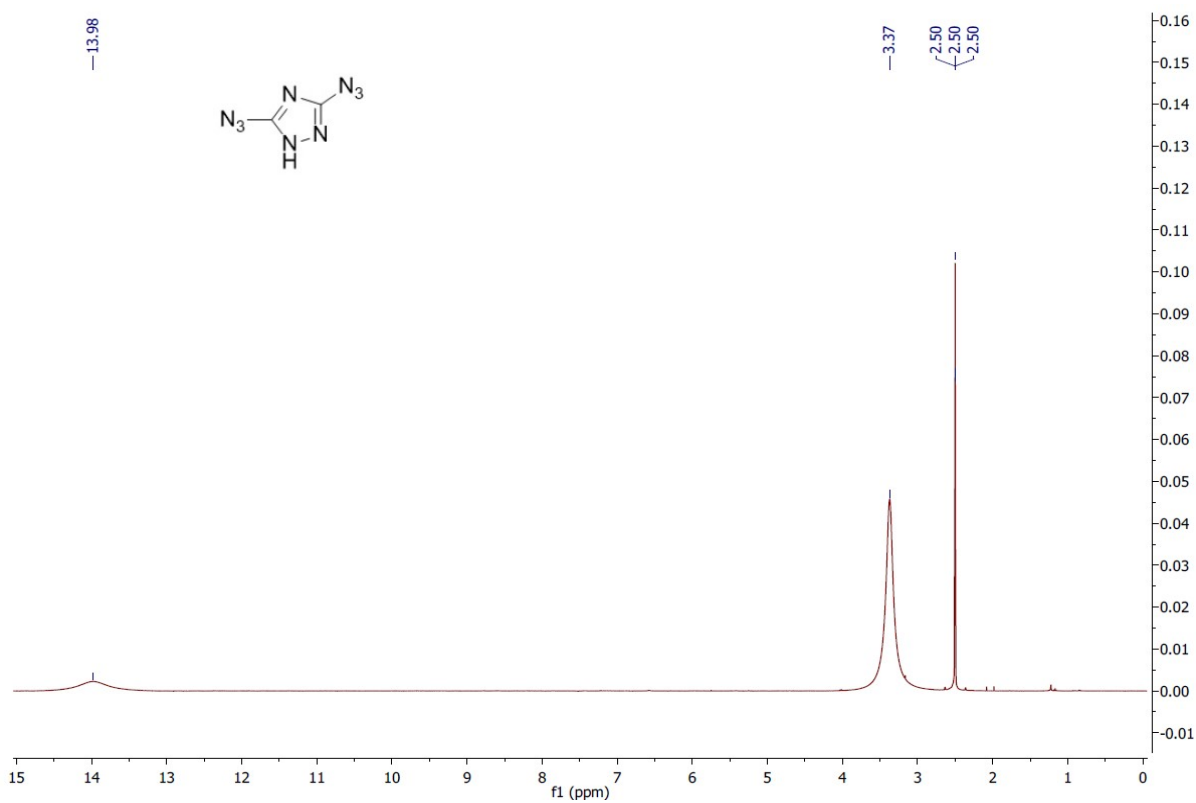

**Figure S13:**  $^1\text{H}$  NMR spectrum of **DATr** (6 months in open air) in **DMSO- $d_6$**  in 500 MHz.

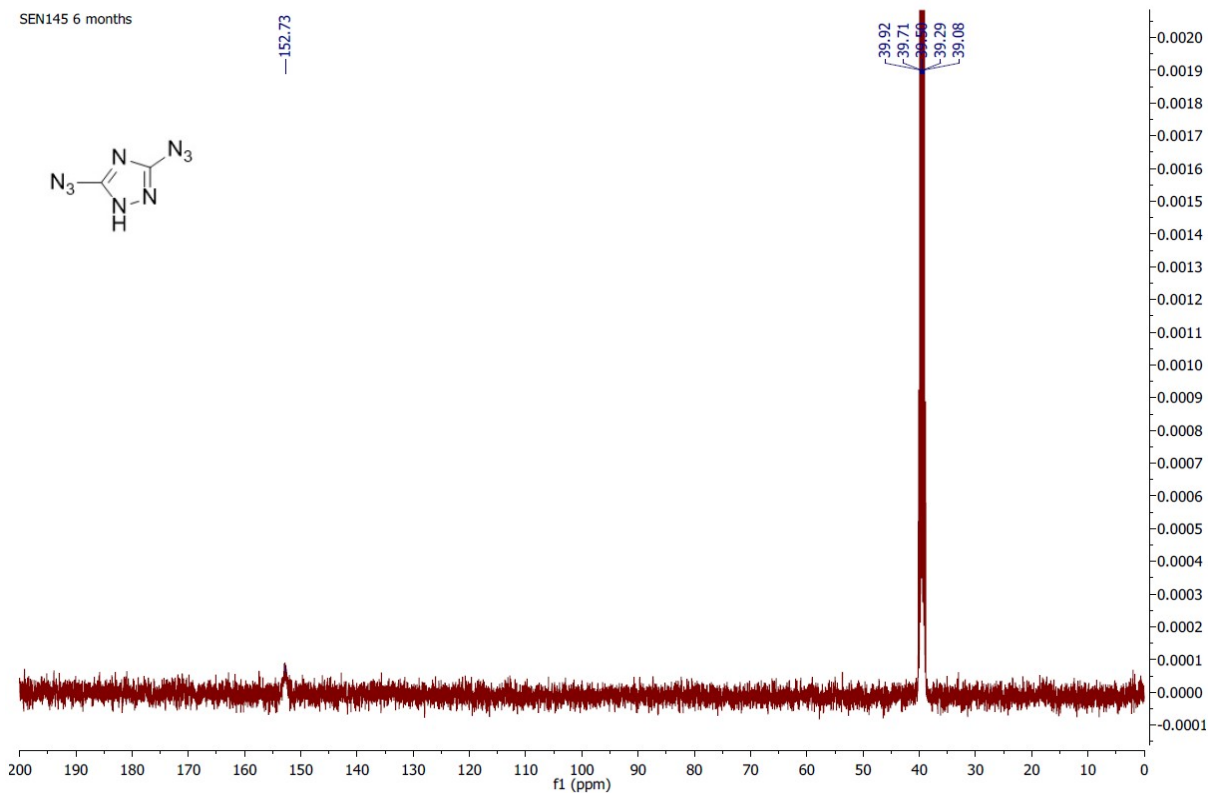

**Figure S14:**  $^{13}\text{C}$  NMR spectrum of DATr (6 months in open air) in  $\text{DMSO-}d_6$  in 126 MHz.

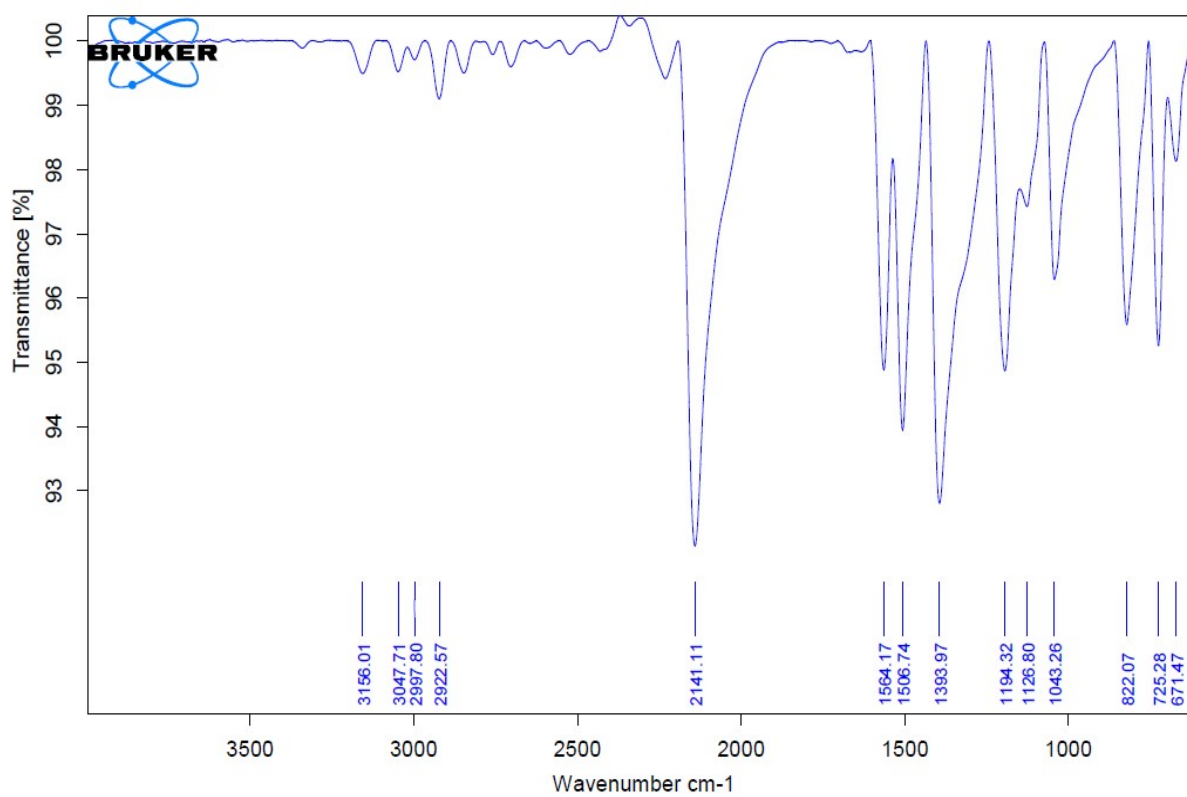

**Figure S15:** IR spectrum of DATr (6 months in open air).
